# Supplementary material for: High-resolution analysis of gene activity during the Xenopus mid-blastula transition
Source: Oxford University Press journal article supplement (doi:10.1242/dev.102012), 2014-04-22
Supplement: dev102012_supp.pdf [file dev102012_supp.pdf]

[Download Supp. Data File](#)

[Download Table S1](#)

[Download Table S2](#)

**Table S3. Sequences of primers used to analyse the expression of Mix1 intron sequences, Histone 1h4a, and Brachyury and Mixer targets**

| Gene                | Forward primer 5'-3'   | Reverse primer 5'-3'  |
|---------------------|------------------------|-----------------------|
| <i>Odc1</i>         | GTTTCGACCTGCCAGAGCTAC  | CAGGGAGAATGCCATGTTCT  |
| <i>Mix1</i> intron  | GCACTGGCGGGTATAAAGAA   | CCAAGCTTTGACCCATTAACA |
| <i>Histone 1h4a</i> | GAGTATGTCTGGACGCGGTA   | TAGATGAGGCCAGAGATGCG  |
| <i>Plod2</i>        | TCATGATGCTTCAACATTCACA | ATGAAACTCCAGCCCTTCCT  |
| <i>Myf5</i>         | TGTGGATCGGATCTCCTCTT   | TGTCAGGTGATCGTGAAAG   |
| <i>Msgn</i>         | GAGAGGGAGAAGCTACGCAT   | GGAGCAGGTTTGTGAGTTCA  |
| <i>Gata5</i>        | GATCCGCCGCCGTAATCCTG   | ACCGCCCCTGGTTTGATT    |
| <i>Cer1</i>         | CCCACGCAAACAAAAGTTCAA  | TGGCACCAGGCTTTTCAGTA  |
